# Supplementary material for: Transcriptome sequencing and expression profiling of genes involved in the response to abiotic stress in Medicago ruthenica
Source: PubMed Central journal article supplement (PMC6136363; doi:10.1590/1678-4685-gmb-2017-0284), 2018-06-28
Supplement: 1415-4757-GMB-1678-4685-GMB-2017-0284-s001.pdf [file 1415-4757-GMB-1678-4685-GMB-2017-0284-s001.pdf]

## Supplementary Material to “Transcriptome sequencing and expression profiling of genes involved in the response to abiotic stress in *Medicago ruthenica*”

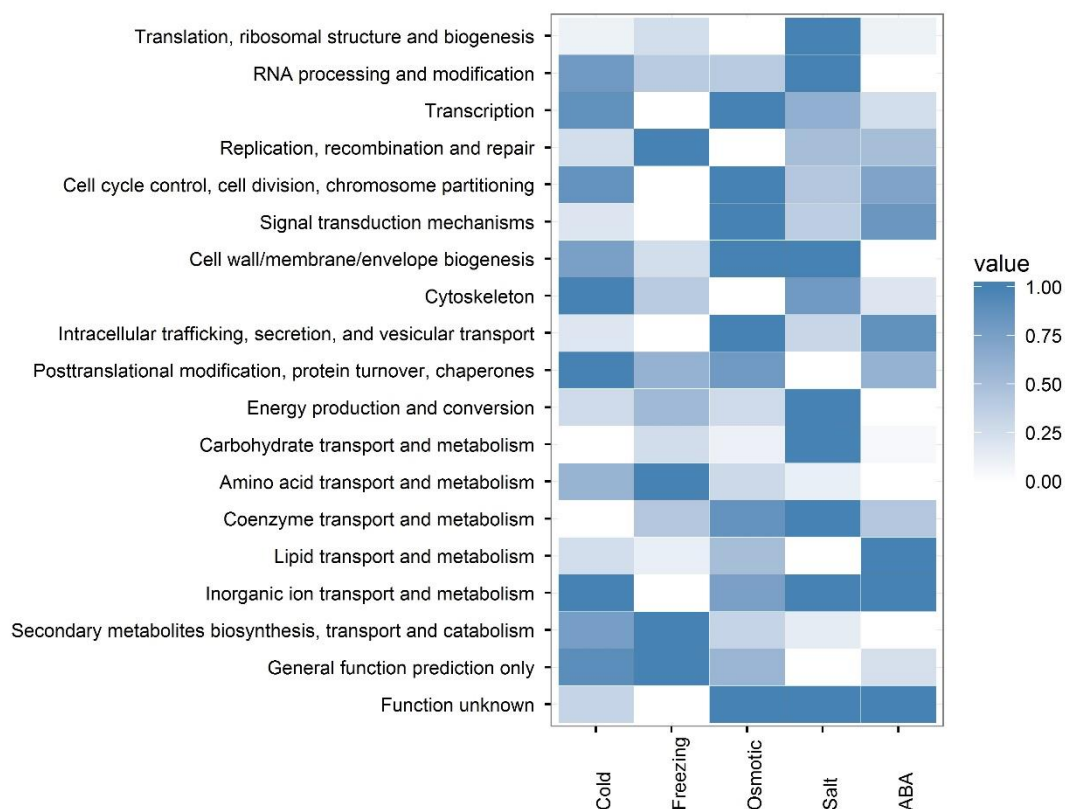

**Figure S1** - KOG functional classification of *Medicago ruthenica* differentially expressed transcripts in the responses to five different abiotic stress treatments. The value of each KOG term is based on the numbers of transcripts present in KOG term; 0 (white) indicates that no transcripts are present, or the fewest transcripts are present, and a value of 1 (dark blue) indicates the highest number of transcripts present.
