# Supplementary material for: Transcriptome sequencing and expression profiling of genes involved in the response to abiotic stress in Medicago ruthenica
Source: PubMed Central journal article supplement (PMC6136363; doi:10.1590/1678-4685-gmb-2017-0284), 2018-06-28
Supplement: 1415-4757-GMB-1678-4685-GMB-2017-0284-s002.pdf [file 1415-4757-GMB-1678-4685-GMB-2017-0284-s002.pdf]

**Supplementary Material to “Transcriptome sequencing and expression profiling of genes involved in the response to abiotic stress in *Medicago ruthenica*”**

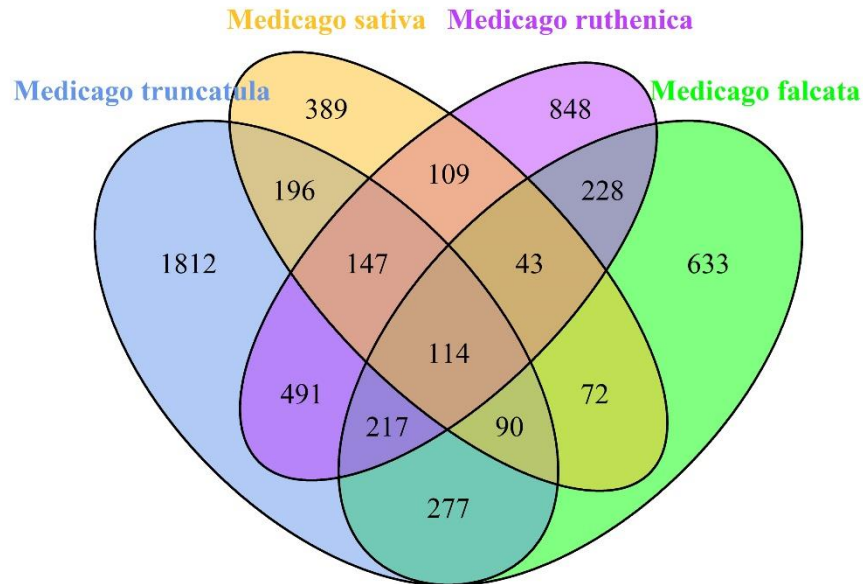

**Figure S2** - Diagrammatic representation of the distributions of differentially expressed transcripts in the response to abiotic stresses in *Medicago*. The Venn diagram shows the overlap of differentially expressed genes in the response to various abiotic stresses in four species of *Medicago*. The *M. truncatula* and *M. sativa* RNA-Seq data were generated from our previous studies, and the *M. falcata* RNA-Seq data is from Miao *et al.* (2016). All DEGs were aligned to *M. truncatula* for determining their relationships, and the overlaps are shown based on their homology.
