# Supplementary material for: Transcriptome sequencing and expression profiling of genes involved in the response to abiotic stress in Medicago ruthenica
Source: PubMed Central journal article supplement (PMC6136363; doi:10.1590/1678-4685-gmb-2017-0284), 2018-06-28
Supplement: 1415-4757-GMB-1678-4685-GMB-2017-0284-s004.pdf [file 1415-4757-GMB-1678-4685-GMB-2017-0284-s004.pdf]

**Supplementary Material to “Transcriptome sequencing and  
expression profiling of genes involved in the response to abiotic stress  
in *Medicago ruthenica*”**

**Table S1** - Functional enrichment analysis of GO terms using topGO for differentially expressed genes in the *Medicago ruthenica* response to abiotic stress

| Group     | GO Terms   | Term Description                            | Total<br>Transcripts | Significant<br>Transcripts | P-value  |
|-----------|------------|---------------------------------------------|----------------------|----------------------------|----------|
|           | GO:0016491 | oxidoreductase activity                     | 2767                 | 247                        | 8.50E-21 |
|           | GO:0046906 | tetrapyrrole binding                        | 650                  | 91                         | 1.60E-19 |
|           | GO:0020037 | heme binding                                | 621                  | 79                         | 9.10E-15 |
|           | GO:0016762 | xyloglucan:xyloglucosyl transferase acti... | 63                   | 20                         | 9.50E-12 |
|           | GO:0016209 | antioxidant activity                        | 207                  | 36                         | 3.20E-11 |
|           | GO:0016758 | transferase activity, transferring hexos... | 771                  | 82                         | 4.00E-11 |
|           | GO:0009055 | electron carrier activity                   | 189                  | 34                         | 4.30E-11 |
|           | GO:0004553 | hydrolase activity, hydrolyzing O-glycos... | 822                  | 84                         | 1.70E-10 |
|           | GO:0004601 | peroxidase activity                         | 183                  | 32                         | 3.40E-10 |
|           | GO:0016684 | oxidoreductase activity, acting on perox... | 183                  | 32                         | 3.40E-10 |
|           | GO:0016705 | oxidoreductase activity, acting on paire... | 854                  | 83                         | 2.40E-09 |
|           | GO:0016798 | hydrolase activity, acting on glycosyl b... | 883                  | 85                         | 2.40E-09 |
|           | GO:0016757 | transferase activity, transferring glyco... | 1001                 | 93                         | 2.60E-09 |
|           | GO:0016984 | ribulose-bisphosphate carboxylase activi... | 9                    | 7                          | 2.10E-08 |
|           | GO:0015035 | protein disulfide oxidoreductase activit... | 61                   | 16                         | 2.40E-08 |
| <b>MF</b> | GO:0015036 | disulfide oxidoreductase activity           | 61                   | 16                         | 2.40E-08 |
|           | GO:0016168 | chlorophyll binding                         | 28                   | 11                         | 3.60E-08 |
|           | GO:0008171 | O-methyltransferase activity                | 78                   | 17                         | 1.70E-07 |
|           | GO:0005509 | calcium ion binding                         | 373                  | 43                         | 1.90E-07 |
|           | GO:0005506 | iron ion binding                            | 528                  | 54                         | 2.90E-07 |
|           | GO:0005507 | copper ion binding                          | 184                  | 26                         | 1.10E-06 |
|           | GO:0046872 | metal ion binding                           | 3817                 | 249                        | 1.20E-06 |
|           | GO:0004857 | enzyme inhibitor activity                   | 151                  | 23                         | 1.20E-06 |
|           | GO:0043169 | cation binding                              | 3839                 | 250                        | 1.30E-06 |
|           | GO:0045735 | nutrient reservoir activity                 | 82                   | 15                         | 9.10E-06 |
|           | GO:0016667 | oxidoreductase activity, acting on a sul... | 112                  | 17                         | 3.10E-05 |
|           | GO:0051213 | dioxygenase activity                        | 403                  | 39                         | 4.30E-05 |
|           | GO:0016706 | oxidoreductase activity, acting on paire... | 307                  | 32                         | 5.00E-05 |
|           | GO:0004066 | asparagine synthase (glutamine-hydrolyzi... | 10                   | 5                          | 5.60E-05 |
|           | GO:0030599 | pectinesterase activity                     | 96                   | 15                         | 6.30E-05 |
|           | GO:0010277 | chlorophyllide a oxygenase [overall] act... | 6                    | 4                          | 7.80E-05 |
|           | GO:0003824 | catalytic activity                          | 16955                | 907                        | 0.00011  |

| Group     | GO Terms   | Term Description                            | Total Transcripts | Significant Transcripts | P-value  |
|-----------|------------|---------------------------------------------|-------------------|-------------------------|----------|
|           | GO:0016746 | transferase activity, transferring acyl ... | 544               | 46                      | 0.00024  |
|           | GO:0001071 | nucleic acid binding transcription facto... | 1372              | 95                      | 0.00042  |
|           | GO:0003700 | sequence-specific DNA binding transcript... | 1372              | 95                      | 0.00042  |
|           | GO:0000990 | core RNA polymerase binding transcriptio... | 15                | 5                       | 0.00055  |
|           | GO:0000996 | core DNA-dependent RNA polymerase bindin... | 15                | 5                       | 0.00055  |
|           | GO:0016987 | sigma factor activity                       | 15                | 5                       | 0.00055  |
|           | GO:0016160 | amylase activity                            | 32                | 7                       | 0.00075  |
|           | GO:0051537 | 2 iron, 2 sulfur cluster binding            | 16                | 5                       | 0.00076  |
|           | GO:0052689 | carboxylic ester hydrolase activity         | 227               | 23                      | 0.00079  |
|           | GO:0008061 | chitin binding                              | 10                | 4                       | 0.00094  |
|           | GO:0016851 | magnesium chelatase activity                | 10                | 4                       | 0.00094  |
|           | GO:0051002 | ligase activity, forming nitrogen-metal ... | 10                | 4                       | 0.00094  |
|           | GO:0051003 | ligase activity, forming nitrogen-metal ... | 10                | 4                       | 0.00094  |
|           | GO:0003854 | 3-beta-hydroxy-delta5-steroid dehydrogen... | 37                | 7                       | 0.00185  |
|           | GO:0016229 | steroid dehydrogenase activity              | 37                | 7                       | 0.00185  |
|           | GO:0033764 | steroid dehydrogenase activity, acting o... | 37                | 7                       | 0.00185  |
|           | GO:0004650 | polygalacturonase activity                  | 71                | 10                      | 0.00228  |
|           | GO:0045156 | electron transporter, transferring elect... | 2                 | 2                       | 0.00238  |
|           | GO:0016703 | oxidoreductase activity, acting on singl... | 13                | 4                       | 0.00283  |
|           | GO:0046933 | proton-transporting ATP synthase activit... | 14                | 4                       | 0.00381  |
|           | GO:0004866 | endopeptidase inhibitor activity            | 65                | 9                       | 0.00417  |
|           | GO:0030414 | peptidase inhibitor activity                | 65                | 9                       | 0.00417  |
|           | GO:0061134 | peptidase regulator activity                | 65                | 9                       | 0.00417  |
|           | GO:0061135 | endopeptidase regulator activity            | 65                | 9                       | 0.00417  |
|           | GO:0016830 | carbon-carbon lyase activity                | 143               | 15                      | 0.00435  |
|           | GO:0008289 | lipid binding                               | 290               | 25                      | 0.00445  |
|           | GO:0004332 | fructose-bisphosphate aldolase activity     | 8                 | 3                       | 0.0054   |
|           | GO:0051536 | iron-sulfur cluster binding                 | 106               | 12                      | 0.00558  |
|           | GO:0051540 | metal cluster binding                       | 106               | 12                      | 0.00558  |
|           | GO:0004867 | serine-type endopeptidase inhibitor acti... | 27                | 5                       | 0.00904  |
|           | GO:0016831 | carboxy-lyase activity                      | 100               | 11                      | 0.00958  |
|           | GO:0019829 | cation-transporting ATPase activity         | 18                | 4                       | 0.00997  |
|           | GO:0044769 | ATPase activity, coupled to transmembran... | 18                | 4                       | 0.00997  |
|           | GO:0015979 | photosynthesis                              | 148               | 68                      | < 1e-30  |
|           | GO:0055114 | oxidation-reduction process                 | 2442              | 232                     | 2.10E-18 |
|           | GO:0019684 | photosynthesis, light reaction              | 58                | 26                      | 2.90E-18 |
| <b>BP</b> | GO:0006979 | response to oxidative stress                | 282               | 52                      | 4.20E-15 |
|           | GO:0006950 | response to stress                          | 1697              | 164                     | 8.80E-14 |
|           | GO:0009628 | response to abiotic stimulus                | 830               | 95                      | 2.30E-12 |
|           | GO:0009765 | photosynthesis, light harvesting            | 30                | 15                      | 5.60E-12 |

| Group | GO Terms   | Term Description                            | Total Transcripts | Significant Transcripts | P-value  |
|-------|------------|---------------------------------------------|-------------------|-------------------------|----------|
|       | GO:1901700 | response to oxygen-containing compound      | 423               | 59                      | 1.70E-11 |
|       | GO:0009416 | response to light stimulus                  | 312               | 48                      | 4.30E-11 |
|       | GO:0010114 | response to red light                       | 29                | 14                      | 5.30E-11 |
|       | GO:0006952 | defense response                            | 328               | 49                      | 7.70E-11 |
|       | GO:0009314 | response to radiation                       | 326               | 48                      | 2.00E-10 |
|       | GO:0009767 | photosynthetic electron transport chain     | 17                | 10                      | 2.50E-09 |
|       | GO:0009607 | response to biotic stimulus                 | 352               | 48                      | 2.70E-09 |
|       | GO:0006091 | generation of precursor metabolites and ... | 240               | 36                      | 2.20E-08 |
|       | GO:0006869 | lipid transport                             | 87                | 20                      | 2.40E-08 |
|       | GO:0010876 | lipid localization                          | 87                | 20                      | 2.40E-08 |
|       | GO:0009644 | response to high light intensity            | 64                | 17                      | 2.70E-08 |
|       | GO:0009405 | pathogenesis                                | 9                 | 7                       | 4.00E-08 |
|       | GO:0009637 | response to blue light                      | 32                | 12                      | 4.30E-08 |
|       | GO:0010033 | response to organic substance               | 625               | 67                      | 5.40E-08 |
|       | GO:0050896 | response to stimulus                        | 3992              | 287                     | 5.80E-08 |
|       | GO:0042221 | response to chemical                        | 964               | 91                      | 1.10E-07 |
|       | GO:0001101 | response to acid                            | 316               | 41                      | 1.50E-07 |
|       | GO:0006073 | cellular glucan metabolic process           | 205               | 31                      | 1.70E-07 |
|       | GO:0044042 | glucan metabolic process                    | 205               | 31                      | 1.70E-07 |
|       | GO:0009642 | response to light intensity                 | 72                | 17                      | 1.80E-07 |
|       | GO:0015977 | carbon fixation                             | 25                | 10                      | 2.90E-07 |
|       | GO:0009773 | photosynthetic electron transport in pho... | 11                | 7                       | 3.40E-07 |
|       | GO:0005976 | polysaccharide metabolic process            | 267               | 35                      | 9.40E-07 |
|       | GO:0010218 | response to far red light                   | 41                | 12                      | 9.70E-07 |
|       | GO:0009719 | response to endogenous stimulus             | 511               | 54                      | 1.60E-06 |
|       | GO:0009266 | response to temperature stimulus            | 281               | 35                      | 3.10E-06 |
|       | GO:0009725 | response to hormone                         | 490               | 51                      | 4.70E-06 |
|       | GO:0044264 | cellular polysaccharide metabolic proces... | 241               | 31                      | 5.70E-06 |
|       | GO:0009768 | photosynthesis, light harvesting in phot... | 4                 | 4                       | 8.10E-06 |
|       | GO:0009639 | response to red or far red light            | 121               | 19                      | 2.30E-05 |
|       | GO:0071555 | cell wall organization                      | 166               | 23                      | 2.70E-05 |
|       | GO:0009617 | response to bacterium                       | 135               | 20                      | 3.40E-05 |
|       | GO:0098542 | defense response to other organism          | 157               | 22                      | 3.40E-05 |
|       | GO:0009611 | response to wounding                        | 96                | 16                      | 4.70E-05 |
|       | GO:0045229 | external encapsulating structure organiz... | 172               | 23                      | 4.80E-05 |
|       | GO:0005975 | carbohydrate metabolic process              | 1522              | 117                     | 4.80E-05 |
|       | GO:0042542 | response to hydrogen peroxide               | 50                | 11                      | 5.30E-05 |
|       | GO:0045454 | cell redox homeostasis                      | 162               | 22                      | 5.50E-05 |
|       | GO:0042545 | cell wall modification                      | 129               | 19                      | 5.70E-05 |
|       | GO:0010035 | response to inorganic substance             | 311               | 34                      | 6.60E-05 |
|       | GO:0006528 | asparagine metabolic process                | 10                | 5                       | 8.70E-05 |
|       | GO:0006529 | asparagine biosynthetic process             | 10                | 5                       | 8.70E-05 |
|       | GO:0019725 | cellular homeostasis                        | 179               | 23                      | 8.90E-05 |

| Group | GO Terms   | Term Description                               | Total<br>Transcripts | Significant<br>Transcripts | P-value |
|-------|------------|------------------------------------------------|----------------------|----------------------------|---------|
|       | GO:0080167 | response to karrikin                           | 82                   | 14                         | 0.00011 |
|       | GO:0009408 | response to heat                               | 147                  | 20                         | 0.00011 |
|       | GO:0033993 | response to lipid                              | 194                  | 24                         | 0.00012 |
|       | GO:0071554 | cell wall organization or biogenesis           | 257                  | 29                         | 0.00013 |
|       | GO:0043207 | response to external biotic stimulus           | 309                  | 33                         | 0.00013 |
|       | GO:0051707 | response to other organism                     | 309                  | 33                         | 0.00013 |
|       | GO:0022900 | electron transport chain                       | 55                   | 11                         | 0.00013 |
|       | GO:0050832 | defense response to fungus                     | 55                   | 11                         | 0.00013 |
|       | GO:0009664 | plant-type cell wall organization              | 96                   | 15                         | 0.00017 |
|       | GO:0009739 | response to gibberellin                        | 39                   | 9                          | 0.00017 |
|       | GO:0048589 | developmental growth                           | 108                  | 16                         | 0.0002  |
|       | GO:0009828 | plant-type cell wall loosening                 | 49                   | 10                         | 0.00022 |
|       | GO:0009827 | plant-type cell wall modification              | 59                   | 11                         | 0.00026 |
|       | GO:0040007 | growth                                         | 169                  | 21                         | 0.00028 |
|       | GO:0000302 | response to reactive oxygen species            | 80                   | 13                         | 0.00031 |
|       | GO:0014070 | response to organic cyclic compound            | 113                  | 16                         | 0.00034 |
|       | GO:0044710 | single-organism metabolic process              | 5672                 | 356                        | 0.00039 |
|       | GO:0009620 | response to fungus                             | 63                   | 11                         | 0.00046 |
|       | GO:0009817 | defense response to fungus, incompatible...    | 20                   | 6                          | 0.00047 |
|       | GO:0071669 | plant-type cell wall organization or bio...    | 107                  | 15                         | 0.00057 |
|       | GO:0042742 | defense response to bacterium                  | 96                   | 14                         | 0.00057 |
|       | GO:0060560 | developmental growth involved in<br>morphog... | 98                   | 14                         | 0.00071 |
|       | GO:0009409 | response to cold                               | 145                  | 18                         | 0.00075 |
|       | GO:0009826 | unidimensional cell growth                     | 89                   | 13                         | 0.00087 |
|       | GO:0044262 | cellular carbohydrate metabolic process        | 400                  | 37                         | 0.00089 |
|       | GO:0008152 | metabolic process                              | 17713                | 1008                       | 0.00096 |
|       | GO:0009831 | plant-type cell wall modification involv...    | 31                   | 7                          | 0.00104 |
|       | GO:0042547 | cell wall modification involved in multi...    | 31                   | 7                          | 0.00104 |
|       | GO:0016049 | cell growth                                    | 151                  | 18                         | 0.00121 |
|       | GO:0015837 | amine transport                                | 5                    | 3                          | 0.0014  |
|       | GO:0032890 | regulation of organic acid transport           | 5                    | 3                          | 0.0014  |
|       | GO:0032973 | amino acid export                              | 5                    | 3                          | 0.0014  |
|       | GO:0044070 | regulation of anion transport                  | 5                    | 3                          | 0.0014  |
|       | GO:0051952 | regulation of amine transport                  | 5                    | 3                          | 0.0014  |
|       | GO:0051955 | regulation of amino acid transport             | 5                    | 3                          | 0.0014  |
|       | GO:0080143 | regulation of amino acid export                | 5                    | 3                          | 0.0014  |
|       | GO:0010019 | chloroplast-nucleus signaling pathway          | 2                    | 2                          | 0.00285 |
|       | GO:0018149 | peptide cross-linking                          | 2                    | 2                          | 0.00285 |
|       | GO:0018316 | peptide cross-linking via L-cystine            | 2                    | 2                          | 0.00285 |
|       | GO:0019253 | reductive pentose-phosphate cycle              | 2                    | 2                          | 0.00285 |
|       | GO:0019685 | photosynthesis, dark reaction                  | 2                    | 2                          | 0.00285 |
|       | GO:0009744 | response to sucrose                            | 20                   | 5                          | 0.00342 |

| Group | GO Terms   | Term Description                            | Total Transcripts | Significant Transcripts | P-value  |
|-------|------------|---------------------------------------------|-------------------|-------------------------|----------|
|       | GO:0034285 | response to disaccharide                    | 20                | 5                       | 0.00342  |
|       | GO:0009651 | response to salt stress                     | 219               | 22                      | 0.00344  |
|       | GO:0010583 | response to cyclopentenone                  | 58                | 9                       | 0.00346  |
|       | GO:0051607 | defense response to virus                   | 13                | 4                       | 0.00393  |
|       | GO:0009699 | phenylpropanoid biosynthetic process        | 21                | 5                       | 0.00429  |
|       | GO:0009806 | lignan metabolic process                    | 21                | 5                       | 0.00429  |
|       | GO:0009807 | lignan biosynthetic process                 | 21                | 5                       | 0.00429  |
|       | GO:0015995 | chlorophyll biosynthetic process            | 21                | 5                       | 0.00429  |
|       | GO:0071229 | cellular response to acid                   | 71                | 10                      | 0.00435  |
|       | GO:0006949 | syncytium formation                         | 30                | 6                       | 0.00453  |
|       | GO:0015994 | chlorophyll metabolic process               | 40                | 7                       | 0.00485  |
|       | GO:0006694 | steroid biosynthetic process                | 42                | 7                       | 0.0064   |
|       | GO:0010206 | photosystem II repair                       | 8                 | 3                       | 0.00696  |
|       | GO:0030091 | protein repair                              | 8                 | 3                       | 0.00696  |
|       | GO:0042592 | homeostatic process                         | 290               | 26                      | 0.00716  |
|       | GO:0002376 | immune system process                       | 113               | 13                      | 0.00735  |
|       | GO:0009615 | response to virus                           | 77                | 10                      | 0.00775  |
|       | GO:0006970 | response to osmotic stress                  | 236               | 22                      | 0.00822  |
|       | GO:0009772 | photosynthetic electron transport in pho... | 3                 | 2                       | 0.00825  |
|       | GO:0009733 | response to auxin                           | 181               | 18                      | 0.00845  |
|       | GO:0015985 | energy coupled proton transport, down el... | 34                | 6                       | 0.00855  |
|       | GO:0015986 | ATP synthesis coupled proton transport      | 34                | 6                       | 0.00855  |
|       | GO:0097305 | response to alcohol                         | 169               | 17                      | 0.00923  |
|       | GO:0009415 | response to water                           | 117               | 13                      | 0.00975  |
|       | GO:0009579 | thylakoid                                   | 358               | 112                     | < 1e-30  |
|       | GO:0034357 | photosynthetic membrane                     | 300               | 103                     | < 1e-30  |
|       | GO:0044436 | thylakoid part                              | 330               | 107                     | < 1e-30  |
|       | GO:0042651 | thylakoid membrane                          | 262               | 82                      | < 1e-30  |
|       | GO:0009521 | photosystem                                 | 88                | 45                      | < 1e-30  |
|       | GO:0009535 | chloroplast thylakoid membrane              | 207               | 63                      | < 1e-30  |
|       | GO:0055035 | plastid thylakoid membrane                  | 207               | 63                      | < 1e-30  |
|       | GO:0009534 | chloroplast thylakoid                       | 237               | 66                      | < 1e-30  |
|       | GO:0031976 | plastid thylakoid                           | 237               | 66                      | < 1e-30  |
| CC    | GO:0031984 | organelle subcompartment                    | 237               | 66                      | < 1e-30  |
|       | GO:0044434 | chloroplast part                            | 603               | 99                      | 1.60E-27 |
|       | GO:0005576 | extracellular region                        | 221               | 58                      | 4.40E-27 |
|       | GO:0044435 | plastid part                                | 630               | 100                     | 1.30E-26 |
|       | GO:0009523 | photosystem II                              | 55                | 30                      | 1.90E-25 |
|       | GO:0048046 | apoplast                                    | 128               | 41                      | 4.20E-23 |
|       | GO:0005618 | cell wall                                   | 355               | 59                      | 5.40E-17 |
|       | GO:0030312 | external encapsulating structure            | 355               | 59                      | 5.40E-17 |
|       | GO:0009507 | chloroplast                                 | 2129              | 186                     | 1.40E-16 |
|       | GO:0009570 | chloroplast stroma                          | 226               | 45                      | 3.00E-16 |

| <b>Group</b> | <b>GO Terms</b> | <b>Term Description</b>                        | <b>Total<br/>Transcripts</b> | <b>Significant<br/>Transcripts</b> | <b>P-value</b> |
|--------------|-----------------|------------------------------------------------|------------------------------|------------------------------------|----------------|
|              | GO:0009532      | plastid stroma                                 | 255                          | 48                                 | 3.20E-16       |
|              | GO:0009536      | plastid                                        | 2187                         | 186                                | 2.10E-15       |
|              | GO:0009654      | photosystem II oxygen evolving complex         | 35                           | 15                                 | 2.10E-11       |
|              | GO:0009522      | photosystem I                                  | 30                           | 14                                 | 2.40E-11       |
|              | GO:0031977      | thylakoid lumen                                | 57                           | 16                                 | 6.80E-09       |
|              | GO:0019898      | extrinsic component of membrane                | 50                           | 15                                 | 7.30E-09       |
|              | GO:0009538      | photosystem I reaction center                  | 6                            | 6                                  | 1.20E-08       |
|              | GO:0009573      | chloroplast ribulose biphosphate carbox...     | 9                            | 7                                  | 2.00E-08       |
|              | GO:0048492      | ribulose biphosphate carboxylase comple...     | 9                            | 7                                  | 2.00E-08       |
|              | GO:0016020      | membrane                                       | 5642                         | 345                                | 5.60E-08       |
|              | GO:0005623      | cell                                           | 9800                         | 549                                | 6.30E-08       |
|              | GO:0044464      | cell part                                      | 9800                         | 549                                | 6.30E-08       |
|              | GO:0030076      | light-harvesting complex                       | 22                           | 9                                  | 3.80E-07       |
|              | GO:0009505      | plant-type cell wall                           | 81                           | 16                                 | 1.30E-06       |
|              | GO:0009941      | chloroplast envelope                           | 303                          | 33                                 | 1.10E-05       |
|              | GO:1990204      | oxidoreductase complex                         | 96                           | 16                                 | 1.30E-05       |
|              | GO:0031225      | anchored component of membrane                 | 129                          | 19                                 | 1.40E-05       |
|              | GO:0009543      | chloroplast thylakoid lumen                    | 41                           | 10                                 | 1.90E-05       |
|              | GO:0031978      | plastid thylakoid lumen                        | 41                           | 10                                 | 1.90E-05       |
|              | GO:0071944      | cell periphery                                 | 1496                         | 107                                | 2.20E-05       |
|              | GO:0030095      | chloroplast photosystem II                     | 5                            | 4                                  | 2.60E-05       |
|              | GO:0009526      | plastid envelope                               | 333                          | 33                                 | 7.50E-05       |
|              | GO:0010287      | plastoglobule                                  | 33                           | 8                                  | 0.00013        |
|              | GO:0031012      | extracellular matrix                           | 21                           | 6                                  | 0.00036        |
|              | GO:0044425      | membrane part                                  | 2145                         | 136                                | 0.00045        |
|              | GO:0044422      | organelle part                                 | 1845                         | 119                                | 0.00057        |
|              | GO:0044446      | intracellular organelle part                   | 1845                         | 119                                | 0.00057        |
|              | GO:0010598      | NAD(P)H dehydrogenase complex<br>(plastoqui... | 5                            | 3                                  | 0.00104        |
|              | GO:0009782      | photosystem I antenna complex                  | 2                            | 2                                  | 0.00233        |
|              | GO:0000322      | storage vacuole                                | 7                            | 3                                  | 0.00338        |
|              | GO:0000326      | protein storage vacuole                        | 7                            | 3                                  | 0.00338        |
|              | GO:0043234      | protein complex                                | 1435                         | 91                                 | 0.00418        |
|              | GO:0022626      | cytosolic ribosome                             | 91                           | 11                                 | 0.00432        |
|              | GO:0000325      | plant-type vacuole                             | 15                           | 4                                  | 0.00479        |
