# Supplementary material for: Transcriptome sequencing and expression profiling of genes involved in the response to abiotic stress in Medicago ruthenica
Source: PubMed Central journal article supplement (PMC6136363; doi:10.1590/1678-4685-gmb-2017-0284), 2018-06-28
Supplement: 1415-4757-GMB-1678-4685-GMB-2017-0284-s005.pdf [file 1415-4757-GMB-1678-4685-GMB-2017-0284-s005.pdf]

**Supplementary Material to “Transcriptome sequencing and  
expression profiling of genes involved in the response to abiotic stress  
in *Medicago ruthenica*”**

**Table S2** - Numbers of DEGs identified as transcription factor genes in the *Medicago ruthenica* response to abiotic stress

| TF family | Cold | Freezing | Osmotic | Salt | ABA | Total |
|-----------|------|----------|---------|------|-----|-------|
| AP2/ERF   | 6    | 10       | 15      | 9    | 13  | 26    |
| bHLH      | 5    | 3        | 6       | 4    | 5   | 16    |
| MYB       | 6    | 3        | 5       | 3    | 3   | 14    |
| WRKY      | 7    | 4        | 12      | 4    | 9   | 14    |
| C2H2      | 2    | 1        | 7       | 3    | 8   | 11    |
| NAC       | 5    | 1        | 3       | 1    | 3   | 8     |
| Tify      | 5    | 1        | 3       | 3    | 3   | 7     |
| GRAS      | 0    | 0        | 2       | 0    | 4   | 5     |
| Other     | 23   | 21       | 22      | 16   | 17  | 59    |
