# Supplementary material for: Transcriptome sequencing and expression profiling of genes involved in the response to abiotic stress in Medicago ruthenica
Source: PubMed Central journal article supplement (PMC6136363; doi:10.1590/1678-4685-gmb-2017-0284), 2018-06-28
Supplement: 1415-4757-GMB-1678-4685-GMB-2017-0284-s006.pdf [file 1415-4757-GMB-1678-4685-GMB-2017-0284-s006.pdf]

**Supplementary Material to “Transcriptome sequencing and  
expression profiling of genes involved in the response to abiotic stress  
in *Medicago ruthenica*”**

**Table S3** - Common DEG pairs identified in both the *Medicago ruthenica* and *Medicago truncatula* responses to abiotic stress

| <i>Medicago ruthenica</i> transcripts | <i>Medicago truncatula</i> genes |
|---------------------------------------|----------------------------------|
| MrUN00466                             | Medtr1g078110                    |
| MrUN00602                             | Medtr2g103170                    |
| MrUN00610                             | Medtr3g100500                    |
| MrUN00763                             | Medtr5g090630                    |
| MrUN01215                             | Medtr4g102670                    |
| MrUN01257                             | Medtr4g076470                    |
| MrUN01274                             | Medtr3g083310                    |
| MrUN01289                             | Medtr4g078710                    |
| MrUN01299                             | Medtr1g084200                    |
| MrUN01395                             | Medtr2g103490                    |
| MrUN01483                             | Medtr5g022870                    |
| MrUN01524                             | Medtr4g099260                    |
| MrUN01662                             | Medtr5g010830                    |
| MrUN01757                             | Medtr3g007240                    |
| MrUN01923                             | Medtr3g115050                    |
| MrUN01940                             | Medtr7g088880                    |
| MrUN01966                             | Medtr2g096210                    |
| MrUN01967                             | Medtr2g435490                    |
| MrUN01980                             | Medtr8g059170                    |
| MrUN02207                             | Medtr6g051780                    |
| MrUN02241                             | Medtr4g075333                    |
| MrUN02276                             | Medtr1g062590                    |
| MrUN02342                             | Medtr1g069805                    |
| MrUN02363                             | Medtr1g101600                    |
| MrUN02438                             | Medtr2g099910                    |
| MrUN02444                             | Medtr6g032820                    |
| MrUN02450                             | Medtr2g028940                    |
| MrUN02488                             | Medtr7g095170                    |
| MrUN02580                             | Medtr1g087920                    |
| MrUN02607                             | Medtr1g090060                    |
| MrUN02644                             | Medtr2g013570                    |
| MrUN02674                             | Medtr4g114870                    |

| <i>Medicago ruthenica</i> transcripts | <i>Medicago truncatula</i> genes |
|---------------------------------------|----------------------------------|
| MrUN02697                             | Medtr7g085260                    |
| MrUN02975                             | Medtr2g067980                    |
| MrUN02982                             | Medtr6g014270                    |
| MrUN03079                             | Medtr7g081570                    |
| MrUN03100                             | Medtr5g017670                    |
| MrUN03103                             | Medtr3g051770                    |
| MrUN03181                             | Medtr5g047060                    |
| MrUN03229                             | Medtr7g076900                    |
| MrUN03253                             | Medtr5g022210                    |
| MrUN03331                             | Medtr7g106440                    |
| MrUN03422                             | Medtr3g462220                    |
| MrUN03452                             | Medtr3g077550                    |
| MrUN03533                             | Medtr2g087810                    |
| MrUN03609                             | Medtr4g124040                    |
| MrUN03674                             | Medtr8g018800                    |
| MrUN03752                             | Medtr3g011820                    |
| MrUN03836                             | Medtr3g104560                    |
| MrUN03864                             | Medtr1g066530                    |
| MrUN04419                             | Medtr8g027495                    |
| MrUN04508                             | Medtr4g105740                    |
| MrUN04725                             | Medtr1g069450                    |
| MrUN04737                             | Medtr4g075710                    |
| MrUN04771                             | Medtr4g086240                    |
| MrUN04843                             | Medtr6g034060                    |
| MrUN04887                             | Medtr4g055420                    |
| MrUN04930                             | Medtr3g068150                    |
| MrUN04953                             | Medtr1g018760                    |
| MrUN05033                             | Medtr1g069605                    |
| MrUN05118                             | Medtr8g096900                    |
| MrUN05232                             | Medtr4g108940                    |
| MrUN05493                             | Medtr1g021652                    |
| MrUN05496                             | Medtr1g103090                    |
| MrUN05525                             | Medtr1g054450                    |
| MrUN05577                             | Medtr1g097935                    |
| MrUN05684                             | Medtr5g025750                    |
| MrUN05738                             | Medtr3g098650                    |
| MrUN05838                             | Medtr7g102490                    |
| MrUN05992                             | Medtr5g075100                    |
| MrUN06009                             | Medtr5g063740                    |
| MrUN06010                             | Medtr8g028425                    |
| MrUN06175                             | Medtr1g052880                    |
| MrUN06244                             | Medtr0055s0050                   |
| MrUN06248                             | Medtr2g084000                    |
| MrUN06254                             | Medtr8g104190                    |

| <i>Medicago ruthenica</i> transcripts | <i>Medicago truncatula</i> genes |
|---------------------------------------|----------------------------------|
| MrUN06368                             | Medtr1g019360                    |
| MrUN06369                             | Medtr3g114750                    |
| MrUN06382                             | Medtr8g081040                    |
| MrUN06386                             | Medtr7g095930                    |
| MrUN06393                             | Medtr3g086940                    |
| MrUN06395                             | Medtr8g099185                    |
| MrUN06419                             | Medtr4g067150                    |
| MrUN06439                             | Medtr4g035430                    |
| MrUN06494                             | Medtr8g078240                    |
| MrUN06542                             | Medtr7g022440                    |
| MrUN06552                             | Medtr6g082280                    |
| MrUN06565                             | Medtr3g106250                    |
| MrUN06617                             | Medtr2g049780                    |
| MrUN06688                             | Medtr4g053250                    |
| MrUN06752                             | Medtr8g096310                    |
| MrUN06782                             | Medtr5g019650                    |
| MrUN06832                             | Medtr4g013385                    |
| MrUN06906                             | Medtr0015s0140                   |
| MrUN07015                             | Medtr1g115560                    |
| MrUN07138                             | Medtr1g072420                    |
| MrUN07143                             | Medtr4g007710                    |
| MrUN07182                             | Medtr1g060550                    |
| MrUN07217                             | Medtr6g014187                    |
| MrUN07272                             | Medtr2g013310                    |
| MrUN07307                             | Medtr4g127120                    |
| MrUN07311                             | Medtr3g083580                    |
| MrUN07352                             | Medtr4g095310                    |
| MrUN07403                             | Medtr2g064840                    |
| MrUN07409                             | Medtr6g008210                    |
| MrUN07422                             | Medtr1g056870                    |
| MrUN07465                             | Medtr4g082330                    |
| MrUN07615                             | Medtr6g016015                    |
| MrUN07722                             | Medtr3g103460                    |
| MrUN07746                             | Medtr8g079950                    |
| MrUN07758                             | Medtr8g106680                    |
| MrUN07876                             | Medtr7g011060                    |
| MrUN07922                             | Medtr2g041960                    |
| MrUN07925                             | Medtr3g072610                    |
| MrUN07939                             | Medtr8g095360                    |
| MrUN08034                             | Medtr5g013530                    |
| MrUN08045                             | Medtr1g033840                    |
| MrUN08098                             | Medtr5g035980                    |
| MrUN08141                             | Medtr4g046713                    |
| MrUN08252                             | Medtr4g019580                    |

| <i>Medicago ruthenica</i> transcripts | <i>Medicago truncatula</i> genes |
|---------------------------------------|----------------------------------|
| MrUN08265                             | Medtr0003s0660                   |
| MrUN08267                             | Medtr0003s0660                   |
| MrUN08273                             | Medtr7g068110                    |
| MrUN08294                             | Medtr4g088770                    |
| MrUN08472                             | Medtr5g072400                    |
| MrUN08507                             | Medtr8g027860                    |
| MrUN08522                             | Medtr4g037690                    |
| MrUN08662                             | Medtr4g094492                    |
| MrUN08679                             | Medtr0334s0010                   |
| MrUN08761                             | Medtr3g110172                    |
| MrUN08846                             | Medtr5g027810                    |
| MrUN08959                             | Medtr1g026410                    |
| MrUN09122                             | Medtr4g105750                    |
| MrUN09211                             | Medtr1g102860                    |
| MrUN09382                             | Medtr2g102140                    |
| MrUN09487                             | Medtr5g012600                    |
| MrUN09554                             | Medtr7g111880                    |
| MrUN09590                             | Medtr6g012380                    |
| MrUN09678                             | Medtr1g058490                    |
| MrUN09861                             | Medtr4g112460                    |
| MrUN09984                             | Medtr4g087830                    |
| MrUN10130                             | Medtr5g036080                    |
| MrUN10174                             | Medtr2g013010                    |
| MrUN10212                             | Medtr8g012240                    |
| MrUN10680                             | Medtr8g024790                    |
| MrUN10796                             | Medtr1g105360                    |
| MrUN10804                             | Medtr8g103700                    |
| MrUN11053                             | Medtr3g080800                    |
| MrUN11060                             | Medtr7g115650                    |
| MrUN11144                             | Medtr1g026380                    |
| MrUN11158                             | Medtr5g029190                    |
| MrUN11225                             | Medtr3g065250                    |
| MrUN11300                             | Medtr1g105495                    |
| MrUN11338                             | Medtr3g064070                    |
| MrUN11553                             | Medtr4g013770                    |
| MrUN11733                             | Medtr5g021670                    |
| MrUN11761                             | Medtr2g009980                    |
| MrUN12021                             | Medtr8g075960                    |
| MrUN12028                             | Medtr1g090370                    |
| MrUN12038                             | Medtr3g091440                    |
| MrUN12105                             | Medtr4g128580                    |
| MrUN12160                             | Medtr4g106970                    |
| MrUN12220                             | Medtr4g063090                    |
| MrUN12236                             | Medtr4g049340                    |

| <i>Medicago ruthenica</i> transcripts | <i>Medicago truncatula</i> genes |
|---------------------------------------|----------------------------------|
| MrUN12298                             | Medtr3g073180                    |
| MrUN12346                             | Medtr2g076070                    |
| MrUN12358                             | Medtr3g062930                    |
| MrUN12366                             | Medtr1g075640                    |
| MrUN13133                             | Medtr1g112510                    |
| MrUN13203                             | Medtr7g102380                    |
| MrUN13322                             | Medtr7g104460                    |
| MrUN13345                             | Medtr3g074860                    |
| MrUN13383                             | Medtr1g115410                    |
| MrUN13478                             | Medtr3g110205                    |
| MrUN13512                             | Medtr4g068970                    |
| MrUN13763                             | Medtr5g014260                    |
| MrUN13812                             | Medtr0365s0010                   |
| MrUN13926                             | Medtr3g073140                    |
| MrUN13989                             | Medtr2g090765                    |
| MrUN14033                             | Medtr2g101380                    |
| MrUN14094                             | Medtr5g089820                    |
| MrUN14140                             | Medtr6g008480                    |
| MrUN14333                             | Medtr4g015860                    |
| MrUN14417                             | Medtr3g435320                    |
| MrUN14497                             | Medtr4g109470                    |
| MrUN15098                             | Medtr5g019920                    |
| MrUN17822                             | Medtr4g051290                    |
| MrUN18705                             | Medtr6g471080                    |
| MrUN18987                             | Medtr3g008470                    |
| MrUN19129                             | Medtr3g008920                    |
| MrUN19133                             | Medtr3g072520                    |
| MrUN19155                             | Medtr2g038040                    |
| MrUN19166                             | Medtr4g134290                    |
| MrUN19167                             | Medtr5g040430                    |
| MrUN19210                             | Medtr7g068650                    |
| MrUN19215                             | Medtr4g092690                    |
| MrUN19238                             | Medtr2g088080                    |
| MrUN19253                             | Medtr8g081600                    |
| MrUN19314                             | Medtr1g074990                    |
| MrUN19318                             | Medtr7g069980                    |
| MrUN19368                             | Medtr1g030600                    |
| MrUN19370                             | Medtr1g081660                    |
| MrUN19373                             | Medtr1g110570                    |
| MrUN19521                             | Medtr5g048050                    |
| MrUN19547                             | Medtr7g095220                    |
| MrUN19619                             | Medtr3g013500                    |
| MrUN19697                             | Medtr8g012420                    |
| MrUN19713                             | Medtr1g021760                    |

| <i>Medicago ruthenica</i> transcripts | <i>Medicago truncatula</i> genes |
|---------------------------------------|----------------------------------|
| MrUN19714                             | Medtr2g064310                    |
| MrUN19730                             | Medtr1g077890                    |
| MrUN19874                             | Medtr2g020240                    |
| MrUN19875                             | Medtr4g080350                    |
| MrUN19956                             | Medtr3g008840                    |
| MrUN19960                             | Medtr4g132020                    |
| MrUN19962                             | Medtr1g105020                    |
| MrUN19968                             | Medtr1g492820                    |
| MrUN19971                             | Medtr5g063670                    |
| MrUN20028                             | Medtr4g059730                    |
| MrUN20061                             | Medtr2g102370                    |
| MrUN20072                             | Medtr3g461480                    |
| MrUN20113                             | Medtr4g011720                    |
| MrUN20115                             | Medtr4g011690                    |
| MrUN20173                             | Medtr5g040960                    |
| MrUN20191                             | Medtr5g026850                    |
| MrUN20264                             | Medtr6g066240                    |
| MrUN20265                             | Medtr2g076070                    |
| MrUN20338                             | Medtr5g085580                    |
| MrUN20378                             | Medtr4g094610                    |
| MrUN20445                             | Medtr1g040875                    |
| MrUN20456                             | Medtr0102s0060                   |
| MrUN20547                             | Medtr8g098945                    |
| MrUN20568                             | Medtr1g059660                    |
| MrUN20578                             | Medtr1g063350                    |
| MrUN20613                             | Medtr4g062330                    |
| MrUN20622                             | Medtr4g014460                    |
| MrUN20644                             | Medtr4g092820                    |
| MrUN20683                             | Medtr8g028225                    |
| MrUN20695                             | Medtr3g020780                    |
| MrUN20767                             | Medtr4g024370                    |
| MrUN20859                             | Medtr8g023060                    |
| MrUN20860                             | Medtr8g023060                    |
| MrUN20893                             | Medtr8g064180                    |
| MrUN20894                             | Medtr3g070860                    |
| MrUN20896                             | Medtr5g094450                    |
| MrUN20899                             | Medtr7g012260                    |
| MrUN21000                             | Medtr3g090900                    |
| MrUN21009                             | Medtr1g013700                    |
| MrUN21014                             | Medtr3g045790                    |
| MrUN21045                             | Medtr3g112530                    |
| MrUN21065                             | Medtr7g417750                    |
| MrUN21068                             | Medtr4g052010                    |
| MrUN21111                             | Medtr3g094080                    |

| <i>Medicago ruthenica</i> transcripts | <i>Medicago truncatula</i> genes |
|---------------------------------------|----------------------------------|
| MrUN21126                             | Medtr3g116380                    |
| MrUN21198                             | Medtr8g100120                    |
| MrUN21215                             | Medtr5g090780                    |
| MrUN21238                             | Medtr5g017210                    |
| MrUN21246                             | Medtr3g491890                    |
| MrUN21286                             | Medtr4g094275                    |
| MrUN21288                             | Medtr2g105090                    |
| MrUN21336                             | Medtr3g093780                    |
| MrUN21340                             | Medtr7g013820                    |
| MrUN21389                             | Medtr2g082410                    |
| MrUN21406                             | Medtr7g023290                    |
| MrUN21482                             | Medtr2g082580                    |
| MrUN21528                             | Medtr1g077790                    |
| MrUN21550                             | Medtr7g011850                    |
| MrUN21568                             | Medtr5g041910                    |
| MrUN21597                             | Medtr2g013140                    |
| MrUN21604                             | Medtr4g107010                    |
| MrUN21775                             | Medtr2g082930                    |
| MrUN21777                             | Medtr7g085490                    |
| MrUN21973                             | Medtr3g064700                    |
| MrUN22008                             | Medtr3g101670                    |
| MrUN22052                             | Medtr2g041550                    |
| MrUN22135                             | Medtr4g109310                    |
| MrUN22378                             | Medtr6g065460                    |
| MrUN22386                             | Medtr2g020060                    |
| MrUN22417                             | Medtr2g020160                    |
| MrUN22422                             | Medtr5g064640                    |
| MrUN22480                             | Medtr8g021380                    |
| MrUN22492                             | Medtr4g102660                    |
| MrUN22499                             | Medtr3g078800                    |
| MrUN22508                             | Medtr4g010140                    |
| MrUN22519                             | Medtr2g436310                    |
| MrUN22531                             | Medtr7g091280                    |
| MrUN22554                             | Medtr5g005420                    |
| MrUN22559                             | Medtr4g085890                    |
| MrUN22588                             | Medtr3g103960                    |
| MrUN22623                             | Medtr5g029370                    |
| MrUN22631                             | Medtr4g129670                    |
| MrUN22647                             | Medtr2g042720                    |
| MrUN22721                             | Medtr8g073120                    |
| MrUN22735                             | Medtr5g020940                    |
| MrUN22745                             | Medtr8g093440                    |
| MrUN22776                             | Medtr8g099135                    |
| MrUN22808                             | Medtr4g088170                    |

| <i>Medicago ruthenica</i> transcripts | <i>Medicago truncatula</i> genes |
|---------------------------------------|----------------------------------|
| MrUN22829                             | Medtr7g099820                    |
| MrUN22836                             | Medtr4g007080                    |
| MrUN22866                             | Medtr1g059970                    |
| MrUN22909                             | Medtr8g032260                    |
| MrUN22952                             | Medtr4g015650                    |
| MrUN22964                             | Medtr7g009820                    |
| MrUN22983                             | Medtr8g017100                    |
| MrUN23007                             | Medtr8g099665                    |
| MrUN23013                             | Medtr7g080530                    |
| MrUN23022                             | Medtr2g078620                    |
| MrUN23024                             | Medtr4g085990                    |
| MrUN23040                             | Medtr1g080990                    |
| MrUN23068                             | Medtr8g107010                    |
| MrUN23070                             | Medtr3g095340                    |
| MrUN23103                             | Medtr7g085200                    |
| MrUN23131                             | Medtr4g086020                    |
| MrUN23137                             | Medtr5g011990                    |
| MrUN23150                             | Medtr4g129560                    |
| MrUN23186                             | Medtr3g105100                    |
| MrUN23217                             | Medtr3g463720                    |
| MrUN23224                             | Medtr4g079160                    |
| MrUN23253                             | Medtr2g084020                    |
| MrUN23254                             | Medtr1g006490                    |
| MrUN23266                             | Medtr8g096640                    |
| MrUN23297                             | Medtr2g010520                    |
| MrUN23338                             | Medtr5g045300                    |
| MrUN23343                             | Medtr4g054920                    |
| MrUN23373                             | Medtr4g133620                    |
| MrUN23391                             | Medtr5g012000                    |
| MrUN23392                             | Medtr4g121570                    |
| MrUN23409                             | Medtr4g089080                    |
| MrUN23418                             | Medtr7g111860                    |
| MrUN23423                             | Medtr4g099510                    |
| MrUN23424                             | Medtr7g405770                    |
| MrUN23645                             | Medtr5g084790                    |
| MrUN23666                             | Medtr5g023730                    |
| MrUN23809                             | Medtr1g084790                    |
| MrUN24189                             | Medtr2g096670                    |
| MrUN24239                             | Medtr7g102450                    |
| MrUN24271                             | Medtr3g082830                    |
| MrUN24353                             | Medtr5g058090                    |
| MrUN24614                             | Medtr2g089120                    |
| MrUN24848                             | Medtr1g061540                    |
| MrUN24881                             | Medtr2g067640                    |



| <i>Medicago ruthenica</i> transcripts | <i>Medicago truncatula</i> genes |
|---------------------------------------|----------------------------------|
| MrUN24901                             | Medtr6g012520                    |
| MrUN24906                             | Medtr3g084520                    |
| MrUN25469                             | Medtr7g032900                    |
| MrUN25647                             | Medtr6g012830                    |
| MrUN25897                             | Medtr1g097270                    |
| MrUN26033                             | Medtr8g077590                    |
| MrUN26102                             | Medtr4g035180                    |
| MrUN26149                             | Medtr1g076940                    |
| MrUN26440                             | Medtr2g073560                    |
| MrUN26610                             | Medtr3g462340                    |
| MrUN26654                             | Medtr7g073380                    |
| MrUN26815                             | Medtr5g025610                    |
| MrUN27006                             | Medtr3g072300                    |
| MrUN27032                             | Medtr2g011210                    |
| MrUN27227                             | Medtr5g087360                    |
| MrUN27235                             | Medtr5g031360                    |
| MrUN27265                             | Medtr7g118300                    |
| MrUN27439                             | Medtr7g076900                    |
| MrUN27442                             | Medtr4g124790                    |
| MrUN27551                             | Medtr2g029910                    |
| MrUN27626                             | Medtr4g015630                    |
| MrUN27630                             | Medtr1g101550                    |
| MrUN27658                             | Medtr7g093040                    |
| MrUN27662                             | Medtr3g113970                    |
| MrUN27747                             | Medtr4g088770                    |
| MrUN27802                             | Medtr5g024020                    |
| MrUN27969                             | Medtr6g032880                    |
| MrUN28008                             | Medtr7g011010                    |
| MrUN28030                             | Medtr4g103330                    |
| MrUN28096                             | Medtr3g114120                    |
| MrUN28151                             | Medtr4g076640                    |
| MrUN28309                             | Medtr6g033725                    |
| MrUN28356                             | Medtr2g011080                    |
| MrUN28509                             | Medtr3g098910                    |
| MrUN28528                             | Medtr2g084805                    |
| MrUN28677                             | Medtr7g100240                    |
| MrUN28730                             | Medtr7g009930                    |
| MrUN28808                             | Medtr5g011220                    |
| MrUN28830                             | Medtr6g038220                    |
| MrUN28870                             | Medtr3g437870                    |
| MrUN29644                             | Medtr2g064930                    |
| MrUN29706                             | Medtr3g464580                    |
| MrUN29740                             | Medtr2g049020                    |
| MrUN29850                             | Medtr4g122180                    |

| <i>Medicago ruthenica</i> transcripts | <i>Medicago truncatula</i> genes |
|---------------------------------------|----------------------------------|
| MrUN30284                             | Medtr4g017640                    |
| MrUN30337                             | Medtr8g024380                    |
| MrUN30731                             | Medtr2g090200                    |
| MrUN30810                             | Medtr0280s0040                   |
| MrUN30812                             | Medtr5g007713                    |
| MrUN30814                             | Medtr7g101395                    |
| MrUN30828                             | Medtr4g109450                    |
| MrUN31036                             | Medtr6g016820                    |
| MrUN31173                             | Medtr2g034480                    |
| MrUN31229                             | Medtr5g089750                    |
| MrUN31657                             | Medtr3g099200                    |
| MrUN31680                             | Medtr1g006600                    |
| MrUN31749                             | Medtr1g090873                    |
| MrUN31811                             | Medtr1g110930                    |
| MrUN31815                             | Medtr6g090380                    |
| MrUN31820                             | Medtr5g064610                    |
| MrUN31873                             | Medtr3g088970                    |
| MrUN31898                             | Medtr5g014090                    |
| MrUN31937                             | Medtr4g063710                    |
| MrUN31952                             | Medtr8g039190                    |
| MrUN31965                             | Medtr2g095130                    |
| MrUN31975                             | Medtr8g016030                    |
| MrUN32009                             | Medtr8g464570                    |
| MrUN32030                             | Medtr4g109170                    |
| MrUN32034                             | Medtr1g061050                    |
| MrUN32062                             | Medtr7g018170                    |
| MrUN32093                             | Medtr2g049020                    |
| MrUN32104                             | Medtr6g016875                    |
| MrUN32119                             | Medtr3g010770                    |
| MrUN32126                             | Medtr4g070430                    |
| MrUN32253                             | Medtr4g130540                    |
| MrUN32343                             | Medtr5g030890                    |
| MrUN32350                             | Medtr2g079650                    |
| MrUN32475                             | Medtr1g077000                    |
| MrUN32628                             | Medtr8g054450                    |
| MrUN32664                             | Medtr5g020990                    |
| MrUN32715                             | Medtr8g006730                    |
| MrUN32724                             | Medtr5g017470                    |
| MrUN32747                             | Medtr7g024320                    |
| MrUN32817                             | Medtr4g125940                    |
| MrUN32882                             | Medtr5g070330                    |
| MrUN32965                             | Medtr3g498825                    |
| MrUN32999                             | Medtr1g063850                    |
| MrUN33003                             | Medtr4g116420                    |

| <i>Medicago ruthenica</i> transcripts | <i>Medicago truncatula</i> genes |
|---------------------------------------|----------------------------------|
| MrUN33021                             | Medtr0154s0040                   |
| MrUN33047                             | Medtr8g033290                    |
| MrUN33067                             | Medtr8g020920                    |
| MrUN33075                             | Medtr5g098420                    |
| MrUN33159                             | Medtr2g097350                    |
| MrUN33180                             | Medtr3g060240                    |
| MrUN33211                             | Medtr5g022970                    |
| MrUN33257                             | Medtr2g089795                    |
| MrUN33270                             | Medtr6g007807                    |
| MrUN33296                             | Medtr4g079850                    |
| MrUN33341                             | Medtr8g087890                    |
| MrUN33367                             | Medtr7g093820                    |
| MrUN33405                             | Medtr4g128570                    |
| MrUN33413                             | Medtr6g004430                    |
| MrUN33474                             | Medtr6g078450                    |
| MrUN33504                             | Medtr7g096930                    |
| MrUN33528                             | Medtr5g464340                    |
| MrUN33555                             | Medtr4g098620                    |
| MrUN33740                             | Medtr1g011800                    |
| MrUN33820                             | Medtr5g020570                    |
| MrUN33864                             | Medtr3g098500                    |
| MrUN33885                             | Medtr2g007960                    |
| MrUN33893                             | Medtr5g031250                    |
| MrUN33925                             | Medtr4g121080                    |
| MrUN33935                             | Medtr3g062890                    |
| MrUN33992                             | Medtr6g043240                    |
| MrUN34038                             | Medtr4g082060                    |
| MrUN34050                             | Medtr1g087540                    |
| MrUN34082                             | Medtr6g033675                    |
| MrUN34094                             | Medtr7g072510                    |
| MrUN34136                             | Medtr4g099130                    |
| MrUN34143                             | Medtr4g133230                    |
| MrUN34180                             | Medtr5g018570                    |
| MrUN34198                             | Medtr4g019210                    |
| MrUN34220                             | Medtr4g066010                    |
| MrUN34262                             | Medtr7g116520                    |
| MrUN34292                             | Medtr6g088670                    |
| MrUN34388                             | Medtr1g034120                    |
| MrUN34411                             | Medtr3g088110                    |
| MrUN34441                             | Medtr8g466240                    |
| MrUN34447                             | Medtr5g082130                    |
| MrUN34467                             | Medtr4g107970                    |
| MrUN34482                             | Medtr6g015815                    |
| MrUN34486                             | Medtr2g013780                    |

| <i>Medicago ruthenica</i> transcripts | <i>Medicago truncatula</i> genes |
|---------------------------------------|----------------------------------|
| MrUN34492                             | Medtr6g023910                    |
| MrUN34535                             | Medtr1g038810                    |
| MrUN34664                             | Medtr8g015950                    |
| MrUN34681                             | Medtr3g116770                    |
| MrUN34813                             | Medtr4g073690                    |
| MrUN34821                             | Medtr5g048160                    |
| MrUN34827                             | Medtr8g099685                    |
| MrUN34887                             | Medtr5g098020                    |
| MrUN34920                             | Medtr1g022445                    |
| MrUN34936                             | Medtr1g059960                    |
| MrUN34950                             | Medtr2g034470                    |
| MrUN34951                             | Medtr2g034470                    |
| MrUN34957                             | Medtr4g011790                    |
| MrUN35002                             | Medtr3g101400                    |
| MrUN35074                             | Medtr8g089840                    |
| MrUN35078                             | Medtr5g056480                    |
| MrUN35109                             | Medtr1g115210                    |
| MrUN35113                             | Medtr6g088670                    |
| MrUN35194                             | Medtr4g037670                    |
| MrUN35214                             | Medtr4g015010                    |
| MrUN35391                             | Medtr2g022480                    |
| MrUN35408                             | Medtr5g096150                    |
| MrUN35415                             | Medtr1g101790                    |
| MrUN35533                             | Medtr7g065890                    |
| MrUN35562                             | Medtr7g068190                    |
| MrUN35574                             | Medtr4g025730                    |
| MrUN35703                             | Medtr6g008560                    |
| MrUN35766                             | Medtr5g030500                    |
| MrUN35833                             | Medtr0443s0040                   |
| MrUN35863                             | Medtr4g114960                    |
| MrUN35925                             | Medtr4g057200                    |
| MrUN35961                             | Medtr8g079950                    |
| MrUN35975                             | Medtr8g068890                    |
| MrUN35979                             | Medtr8g096920                    |
| MrUN35988                             | Medtr3g094000                    |
| MrUN36001                             | Medtr1g080110                    |
| MrUN36009                             | Medtr3g105550                    |
| MrUN36032                             | Medtr4g104700                    |
| MrUN36160                             | Medtr1g052640                    |
| MrUN36188                             | Medtr7g093450                    |
| MrUN36220                             | Medtr7g116500                    |
| MrUN36251                             | Medtr2g027780                    |
| MrUN36403                             | Medtr8g432470                    |
| MrUN36404                             | Medtr8g432490                    |

| <i>Medicago ruthenica</i> transcripts | <i>Medicago truncatula</i> genes |
|---------------------------------------|----------------------------------|
| MrUN36406                             | Medtr7g081270                    |
| MrUN36420                             | Medtr8g104520                    |
| MrUN36429                             | Medtr6g012450                    |
| MrUN36459                             | Medtr5g048550                    |
| MrUN36477                             | Medtr3g024510                    |
| MrUN36661                             | Medtr1g026410                    |
| MrUN36773                             | Medtr4g131400                    |
| MrUN36775                             | Medtr5g096670                    |
| MrUN36810                             | Medtr1g107380                    |
| MrUN36812                             | Medtr8g027745                    |
| MrUN36837                             | Medtr3g081500                    |
| MrUN36911                             | Medtr4g130540                    |
| MrUN36942                             | Medtr2g088770                    |
| MrUN36951                             | Medtr3g101560                    |
| MrUN36998                             | Medtr3g118290                    |
| MrUN37008                             | Medtr8g009080                    |
| MrUN37015                             | Medtr1g040430                    |
| MrUN37095                             | Medtr6g016640                    |
| MrUN37165                             | Medtr5g042420                    |
| MrUN37204                             | Medtr6g069560                    |
| MrUN37264                             | Medtr6g472100                    |
| MrUN37384                             | Medtr5g017850                    |
| MrUN37393                             | Medtr5g017850                    |
| MrUN37397                             | Medtr3g078700                    |
| MrUN37404                             | Medtr5g012290                    |
| MrUN37456                             | Medtr2g099010                    |
| MrUN37511                             | Medtr7g114900                    |
| MrUN37527                             | Medtr7g458880                    |
| MrUN37532                             | Medtr4g086620                    |
| MrUN37540                             | Medtr3g104980                    |
| MrUN37588                             | Medtr3g101290                    |
| MrUN37703                             | Medtr8g081620                    |
| MrUN37754                             | Medtr7g105870                    |
| MrUN37773                             | Medtr1g090290                    |
| MrUN37796                             | Medtr5g090580                    |
| MrUN37838                             | Medtr8g090205                    |
| MrUN37885                             | Medtr7g114590                    |
| MrUN38006                             | Medtr2g079990                    |
| MrUN38027                             | Medtr7g092460                    |
| MrUN38163                             | Medtr7g074250                    |
| MrUN38198                             | Medtr3g479470                    |
| MrUN38295                             | Medtr1g115740                    |
| MrUN38328                             | Medtr8g024050                    |
| MrUN38351                             | Medtr4g094625                    |

| <i>Medicago ruthenica</i> transcripts | <i>Medicago truncatula</i> genes |
|---------------------------------------|----------------------------------|
| MrUN38397                             | Medtr5g059820                    |
| MrUN38400                             | Medtr1g084790                    |
| MrUN38409                             | Medtr8g019660                    |
| MrUN38500                             | Medtr8g092460                    |
| MrUN38544                             | Medtr7g117310                    |
| MrUN38556                             | Medtr2g098250                    |
| MrUN38576                             | Medtr8g090025                    |
| MrUN38635                             | Medtr8g071130                    |
| MrUN38728                             | Medtr7g088330                    |
| MrUN38821                             | Medtr7g086690                    |
| MrUN38852                             | Medtr4g086190                    |
| MrUN38853                             | Medtr8g018620                    |
| MrUN38888                             | Medtr8g020590                    |
| MrUN38955                             | Medtr2g100340                    |
| MrUN38960                             | Medtr8g085900                    |
| MrUN38966                             | Medtr7g084770                    |
| MrUN39089                             | Medtr7g024390                    |
| MrUN39307                             | Medtr8g070830                    |
| MrUN39353                             | Medtr6g088475                    |
| MrUN39354                             | Medtr6g088445                    |
| MrUN39357                             | Medtr2g022700                    |
| MrUN39360                             | Medtr5g025650                    |
| MrUN39410                             | Medtr5g041700                    |
| MrUN39435                             | Medtr7g074710                    |
| MrUN39474                             | Medtr8g014910                    |
| MrUN39493                             | Medtr4g128260                    |
| MrUN39518                             | Medtr3g090760                    |
| MrUN39528                             | Medtr0184s0030                   |
| MrUN39534                             | Medtr3g091760                    |
| MrUN39573                             | Medtr0072s0040                   |
| MrUN39580                             | Medtr6g069600                    |
| MrUN39618                             | Medtr4g065077                    |
| MrUN39673                             | Medtr4g118480                    |
| MrUN39737                             | Medtr2g089140                    |
| MrUN39798                             | Medtr0035s0150                   |
| MrUN39857                             | Medtr1g007380                    |
| MrUN39986                             | Medtr4g087160                    |
| MrUN40033                             | Medtr1g100623                    |
| MrUN40041                             | Medtr7g106000                    |
| MrUN40064                             | Medtr3g082100                    |
| MrUN40162                             | Medtr7g097060                    |
| MrUN40182                             | Medtr7g118330                    |
| MrUN40196                             | Medtr3g091340                    |
| MrUN40259                             | Medtr3g112160                    |

| <i>Medicago ruthenica</i> transcripts | <i>Medicago truncatula</i> genes |
|---------------------------------------|----------------------------------|
| MrUN40292                             | Medtr8g098410                    |
| MrUN40317                             | Medtr7g106340                    |
| MrUN40324                             | Medtr4g127290                    |
| MrUN40347                             | Medtr5g012810                    |
| MrUN40409                             | Medtr2g450080                    |
| MrUN40421                             | Medtr1g016070                    |
| MrUN40510                             | Medtr6g090460                    |
| MrUN40571                             | Medtr1g086650                    |
| MrUN40603                             | Medtr2g099950                    |
| MrUN40627                             | Medtr5g011250                    |
| MrUN40629                             | Medtr8g026960                    |
| MrUN40647                             | Medtr3g071740                    |
| MrUN40658                             | Medtr7g114490                    |
| MrUN40668                             | Medtr4g021800                    |
| MrUN40670                             | Medtr5g094390                    |
| MrUN40683                             | Medtr7g114560                    |
| MrUN40762                             | Medtr3g110450                    |
| MrUN40811                             | Medtr1g110870                    |
| MrUN40859                             | Medtr7g084300                    |
| MrUN40889                             | Medtr8g042870                    |
| MrUN40897                             | Medtr6g023340                    |
| MrUN40911                             | Medtr2g044920                    |
| MrUN41186                             | Medtr4g119780                    |
| MrUN41238                             | Medtr4g009620                    |
| MrUN41386                             | Medtr7g093260                    |
| MrUN41525                             | Medtr1g057270                    |
| MrUN41531                             | Medtr7g068770                    |
| MrUN41628                             | Medtr1g116120                    |
| MrUN41710                             | Medtr8g081040                    |
| MrUN41763                             | Medtr1g035690                    |
| MrUN41921                             | Medtr5g014520                    |
| MrUN42177                             | Medtr5g039390                    |
| MrUN42287                             | Medtr4g094010                    |
| MrUN42510                             | Medtr7g088820                    |
| MrUN42784                             | Medtr7g116510                    |
| MrUN42792                             | Medtr1g031650                    |
| MrUN42817                             | Medtr2g087950                    |
| MrUN42898                             | Medtr4g077070                    |
| MrUN42900                             | Medtr1g077990                    |
| MrUN42944                             | Medtr2g040000                    |
| MrUN42987                             | Medtr3g064080                    |
| MrUN43048                             | Medtr8g069825                    |
| MrUN43119                             | Medtr4g122500                    |
| MrUN43148                             | Medtr5g019010                    |

| <i>Medicago ruthenica</i> transcripts | <i>Medicago truncatula</i> genes |
|---------------------------------------|----------------------------------|
| MrUN43224                             | Medtr3g074230                    |
| MrUN43417                             | Medtr5g029750                    |
| MrUN43425                             | Medtr3g065440                    |
| MrUN43624                             | Medtr7g111030                    |
| MrUN43687                             | Medtr5g098170                    |
| MrUN43708                             | Medtr4g094828                    |
| MrUN43724                             | Medtr7g101930                    |
| MrUN43733                             | Medtr5g011520                    |
| MrUN43751                             | Medtr5g036410                    |
| MrUN43784                             | Medtr1g102360                    |
| MrUN43867                             | Medtr6g009200                    |
| MrUN43957                             | Medtr2g437380                    |
| MrUN43958                             | Medtr4g077620                    |
| MrUN44014                             | Medtr2g090960                    |
| MrUN44068                             | Medtr2g045780                    |
| MrUN44105                             | Medtr3g009010                    |
| MrUN44212                             | Medtr3g008010                    |
| MrUN44305                             | Medtr2g100560                    |
| MrUN44465                             | Medtr7g062580                    |
| MrUN44499                             | Medtr7g072605                    |
| MrUN44771                             | Medtr5g030920                    |
| MrUN44849                             | Medtr5g026500                    |
| MrUN44880                             | Medtr3g070800                    |
| MrUN44965                             | Medtr3g437630                    |
| MrUN45155                             | Medtr7g085310                    |
| MrUN45232                             | Medtr1g073740                    |
| MrUN45424                             | Medtr7g098650                    |
| MrUN45431                             | Medtr8g022810                    |
| MrUN45489                             | Medtr2g011180                    |
| MrUN56078                             | Medtr7g050980                    |
| MrUN59732                             | Medtr1g019750                    |
| MrUN60721                             | Medtr1g115535                    |
| MrUN62562                             | Medtr4g009590                    |
| MrUN63427                             | Medtr0056s0160                   |
| MrUN63913                             | Medtr4g092550                    |
| MrUN63915                             | Medtr4g092530                    |
| MrUN64793                             | Medtr1g105860                    |
| MrUN65459                             | Medtr5g013640                    |
| MrUN65610                             | Medtr1g111100                    |
| MrUN66246                             | Medtr1g038430                    |
| MrUN68267                             | Medtr2g034720                    |
| MrUN68297                             | Medtr8g045890                    |
| MrUN68514                             | Medtr2g021190                    |
| MrUN69372                             | Medtr2g084020                    |



---

| <i>Medicago ruthenica</i> transcripts | <i>Medicago truncatula</i> genes |
|---------------------------------------|----------------------------------|
| MrUN69802                             | Medtr4g108100                    |
| MrUN71337                             | Medtr4g097920                    |
| MrUN72843                             | Medtr8g032000                    |
| MrUN72967                             | Medtr4g033325                    |
| MrUN74016                             | Medtr1g090687                    |
| MrUN74117                             | Medtr6g048440                    |

---
