# Supplementary material for: Transcriptome sequencing and expression profiling of genes involved in the response to abiotic stress in Medicago ruthenica
Source: PubMed Central journal article supplement (PMC6136363; doi:10.1590/1678-4685-gmb-2017-0284), 2018-06-28
Supplement: 1415-4757-GMB-1678-4685-GMB-2017-0284-s008.pdf [file 1415-4757-GMB-1678-4685-GMB-2017-0284-s008.pdf]

**Supplementary Material to “Transcriptome sequencing and  
expression profiling of genes involved in the response to abiotic stress  
in *Medicago ruthenica*”**

**Table S5** - Phytohormone-related unigenes that were differentially expressed in response to abiotic stress in *Medicago ruthenica*.

| Hormone   | UniGenes  | Log2(Fold Changes) |          |         |       |       |
|-----------|-----------|--------------------|----------|---------|-------|-------|
|           |           | Cold               | Freezing | Osmotic | Salt  | ABA   |
| ABA       | MrUN01823 | 3.08               | 2.77     | 2.23    | 0.79  | 4.44  |
|           | MrUN02488 | -1.61              | -0.63    | 1.67    | 1.61  | 1.32  |
|           | MrUN03429 | -2.07              | -2.33    | -1.24   | 0.13  | -0.82 |
|           | MrUN04931 | 0.73               | -4.97    | 1.31    | 1.87  | 1.88  |
|           | MrUN12110 | -0.52              | -3.37    | -0.64   | 0.65  | 0.55  |
|           | MrUN19623 | 2.61               | -1.59    | 1.69    | -0.35 | 2.83  |
|           | MrUN20299 | 0.13               | -3.30    | 0.79    | 1.71  | 1.82  |
|           | MrUN27218 | -0.88              | 0.00     | 0.20    | 2.79  | -1.84 |
|           | MrUN31898 | -0.05              | 0.51     | -2.22   | -1.41 | -2.37 |
|           | MrUN32485 | -0.11              | 0.62     | -1.92   | -0.38 | -2.70 |
|           | MrUN33922 | 1.47               | 1.15     | -0.54   | -0.64 | -0.13 |
|           | MrUN35766 | 1.53               | 1.39     | -0.78   | -0.54 | -0.54 |
|           | MrUN38104 | -0.12              | -1.50    | 0.02    | 1.40  | -0.04 |
|           | MrUN38702 | -3.25              | -4.75    | -3.02   | -1.31 | -2.09 |
|           | MrUN64793 | -3.16              | -2.41    | -1.10   | -0.70 | -2.46 |
|           | MrUN68297 | -2.02              | -0.99    | -2.03   | -0.94 | -0.17 |
|           | GA        | MrUN05525          | -1.17    | -2.42   | 1.20  | 1.48  |
| MrUN07876 |           | 0.76               | 0.96     | 0.86    | 0.87  | 2.04  |
| MrUN19564 |           | 1.46               | 0.27     | 1.65    | -1.54 | 1.75  |
| MrUN21275 |           | 2.28               | 0.88     | 2.13    | 2.08  | 2.28  |
| MrUN21674 |           | 2.64               | 2.21     | 0.63    | 0.12  | 0.58  |
| MrUN27354 |           | -0.57              | -0.14    | 1.96    | 3.01  | 2.74  |
| MrUN39273 |           | -0.12              | -0.59    | 0.91    | 1.52  | 1.67  |
| MrUN02313 |           | 4.04               | 4.45     | 2.68    | 2.52  | 4.34  |
| MrUN02949 |           | -0.35              | 0.50     | -3.31   | -1.35 | -3.25 |
| MrUN09781 |           | 2.12               | 2.01     | 2.45    | 1.07  | 3.41  |
| Auxin     | MrUN19451 | 1.95               | 2.08     | 1.95    | 0.86  | 1.94  |
|           | MrUN20456 | 1.23               | -2.74    | -1.21   | -0.36 | -0.53 |
|           | MrUN22415 | 0.21               | -0.58    | 1.89    | 0.84  | 1.77  |
|           | MrUN25721 | 0.39               | 0.92     | -1.79   | -0.99 | -2.15 |
|           | MrUN27459 | 0.19               | -3.20    | 1.76    | 2.60  | 3.36  |

| Hormone   | UniGenes  | Log2(Fold Changes) |          |         |       |       |
|-----------|-----------|--------------------|----------|---------|-------|-------|
|           |           | Cold               | Freezing | Osmotic | Salt  | ABA   |
|           | MrUN30617 | -0.38              | 0.48     | -2.71   | -1.81 | -2.57 |
|           | MrUN31229 | 2.18               | 2.20     | 0.18    | -0.81 | -0.09 |
|           | MrUN34160 | 0.36               | 0.31     | -2.03   | -0.18 | -1.33 |
|           | MrUN36270 | -0.62              | -2.24    | 0.15    | 0.22  | 0.50  |
|           | MrUN37653 | 4.26               | 3.47     | 1.94    | 2.73  | 2.61  |
|           | MrUN39798 | -0.15              | 0.46     | -1.12   | -1.08 | -2.16 |
|           | MrUN41386 | 2.53               | 2.40     | -0.44   | -0.10 | 0.47  |
|           | MrUN42128 | -1.68              | -3.54    | -2.89   | -1.52 | -1.78 |
|           | MrUN45460 | -0.58              | -7.36    | 1.71    | 1.89  | 3.48  |
|           | MrUN63653 | -0.40              | -1.57    | 2.41    | 1.96  | 3.26  |
| Cytokinin | MrUN33026 | -1.06              | -4.90    | 1.73    | 1.42  | 2.81  |
|           | MrUN01653 | 0.90               | 0.68     | -2.15   | -1.02 | -3.51 |
|           | MrUN08034 | 2.65               | -0.27    | -0.87   | -0.63 | -1.54 |
|           | MrUN22155 | 1.53               | -0.99    | 1.98    | 2.24  | 1.96  |
| JA        | MrUN22480 | 1.76               | 1.30     | -1.20   | -1.34 | -1.68 |
|           | MrUN27819 | 3.05               | -2.16    | -2.59   | -1.07 | -1.44 |
|           | MrUN27922 | 0.13               | 0.15     | -2.92   | -1.64 | -3.98 |
|           | MrUN40276 | 0.46               | 0.05     | -3.60   | -1.78 | -3.46 |
| BA        | MrUN13345 | -0.19              | 0.03     | -3.73   | -2.07 | -4.27 |
|           | MrUN33528 | -0.06              | 0.25     | -2.57   | -1.71 | -2.93 |
